# Supplementary material for: Open-Ocean Tides Simulated by ICON-O
Source: Copernicus journal article supplement (doi:10.5194/egusphere-2023-503), 2023-05-05
Supplement: Supplementary file [file egusphere-2023-503-AC2-supplement.pdf]

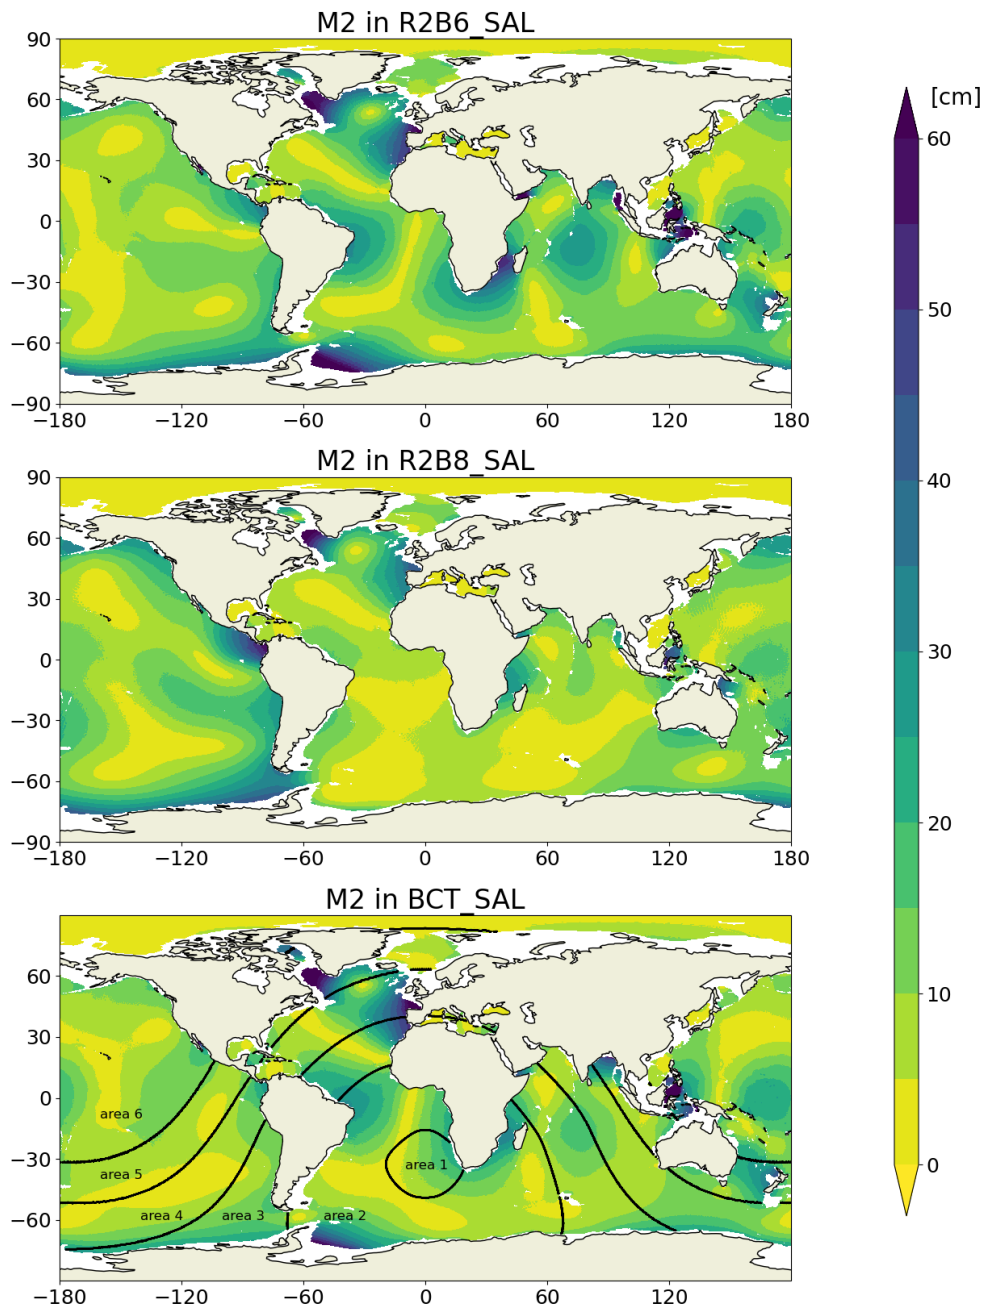

Fig.CR1-1 (as. Fig.6 but with SAL): Difference  $d_k$  resulting from the total error of the  $M_2$  tide in ICON-O with the SAL parameterization in the R2B6 (top), R2B8 (middle) and BCT configuration (bottom).  $d_k$  is defined in Eq.(1) in the main text and evaluated against TPXO9. Unit is cm.

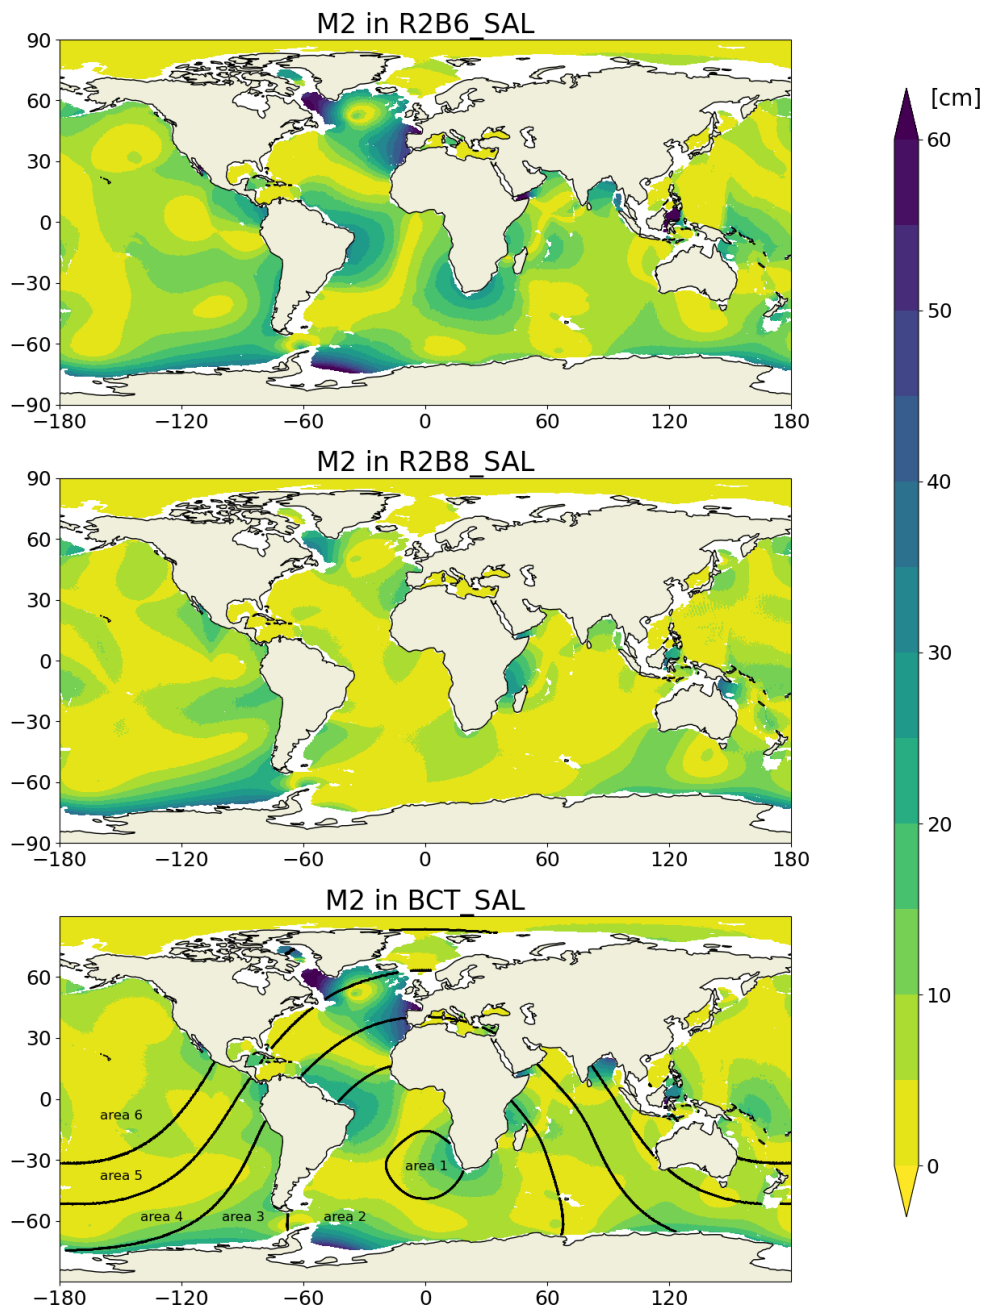

Fig.RC1-2 (as Fig.7 but with SAL): Same as Fig.RC1-1 but for the difference  $d_{k,AM}$  resulting from errors in amplitude only.

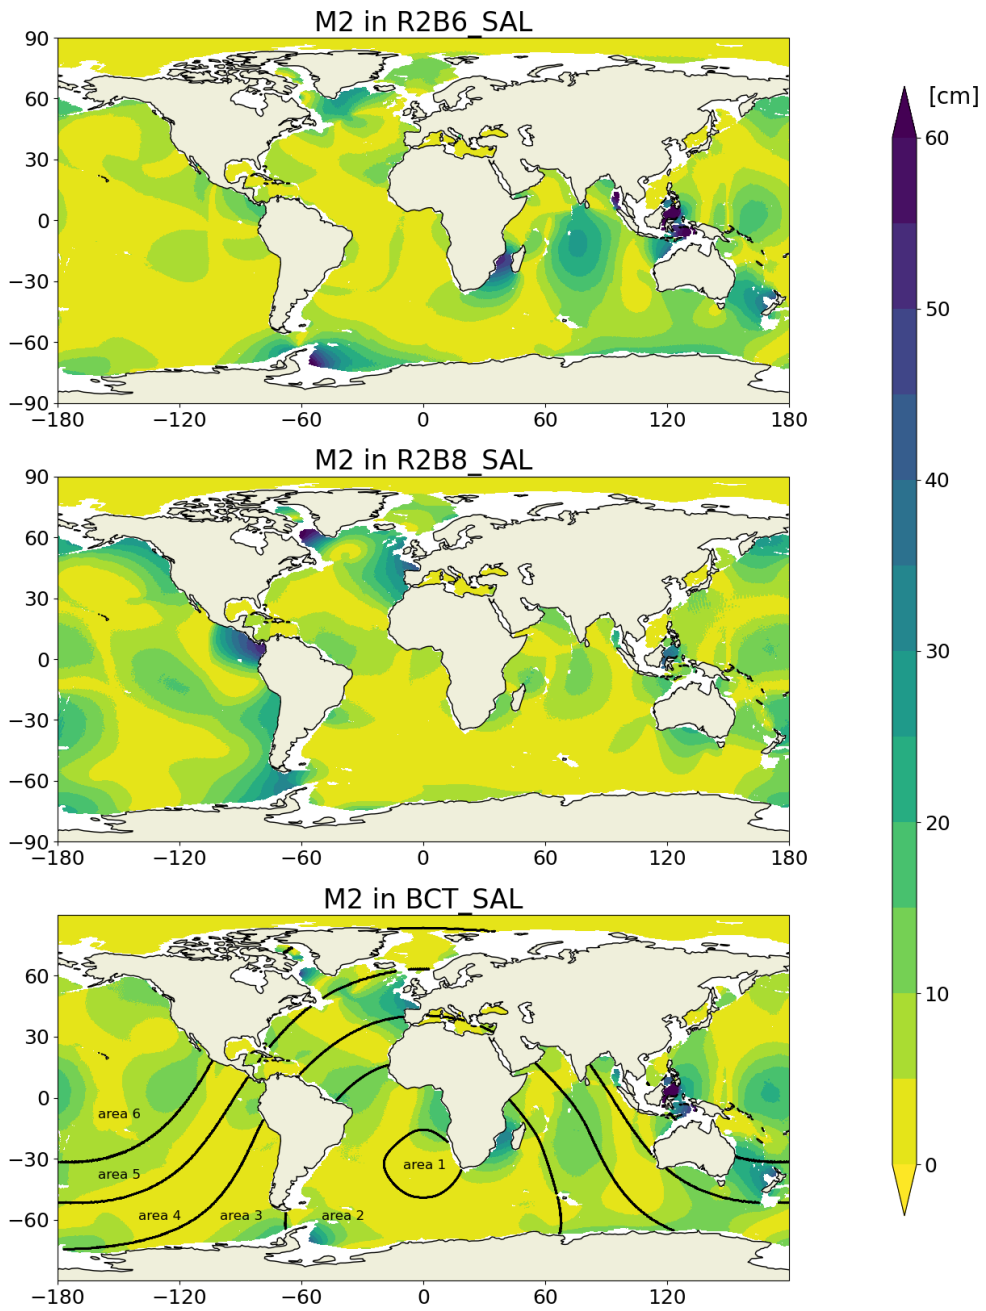

Fig.RC1-3 (as. Fig.8 but with SAL): Same as Fig.RC1-1 but for the difference  $d_{k,PH}$  resulting from errors in phase only.

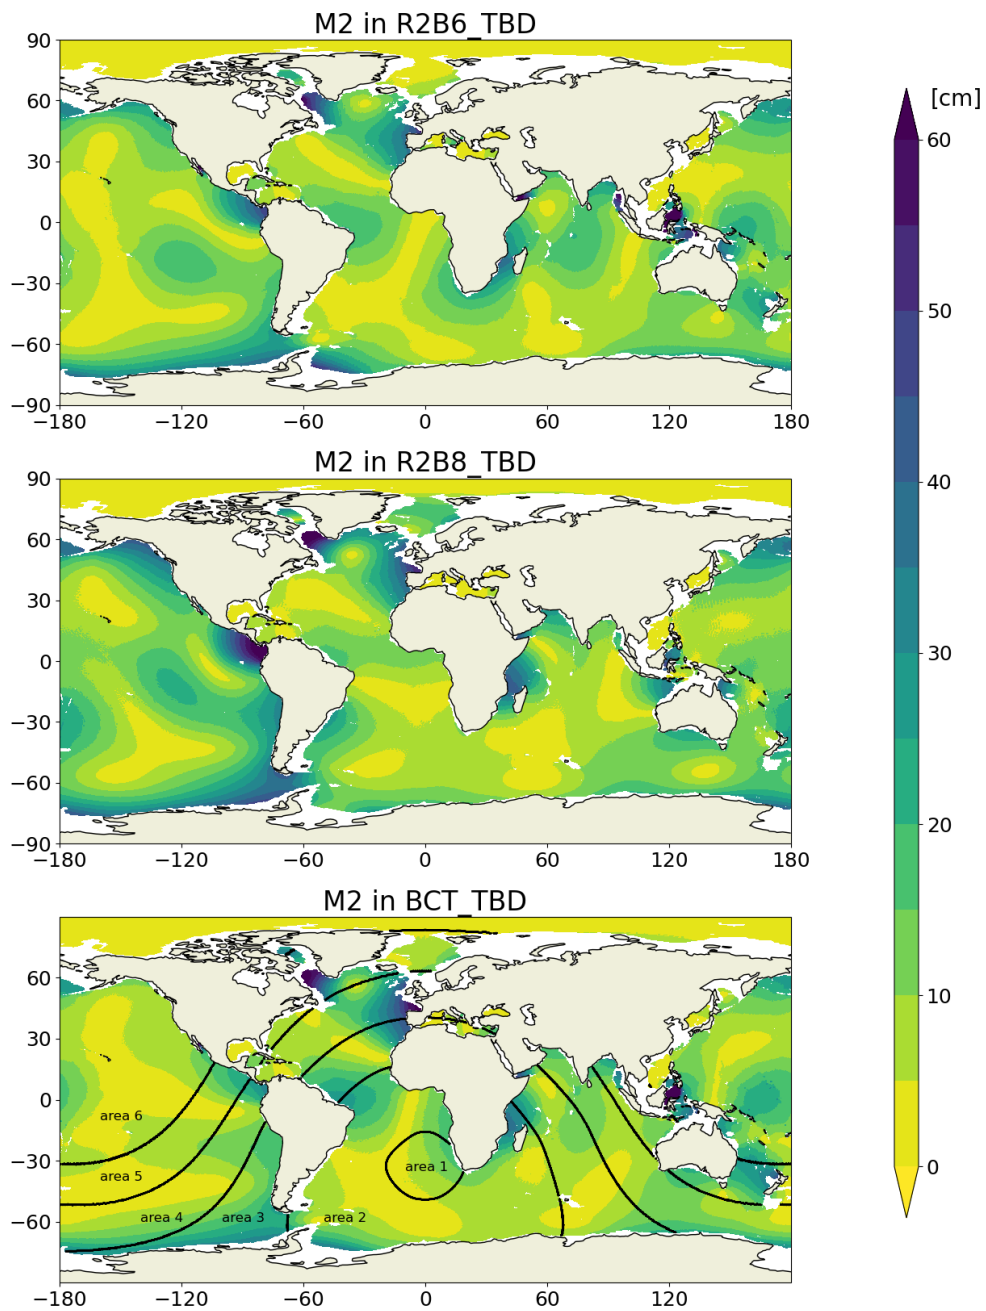

Fig.CR1-4 (as. Fig.6 but with TWD): Difference  $d_k$  resulting from the total error of the M<sub>2</sub> tide in ICON-O with the TWD parameterization in the R2B6 (top), R2B8 (middle) and BCT configuration (bottom).  $d_k$  is defined in Eq.(1) in the main text and evaluated against TPX09. Unit is cm.

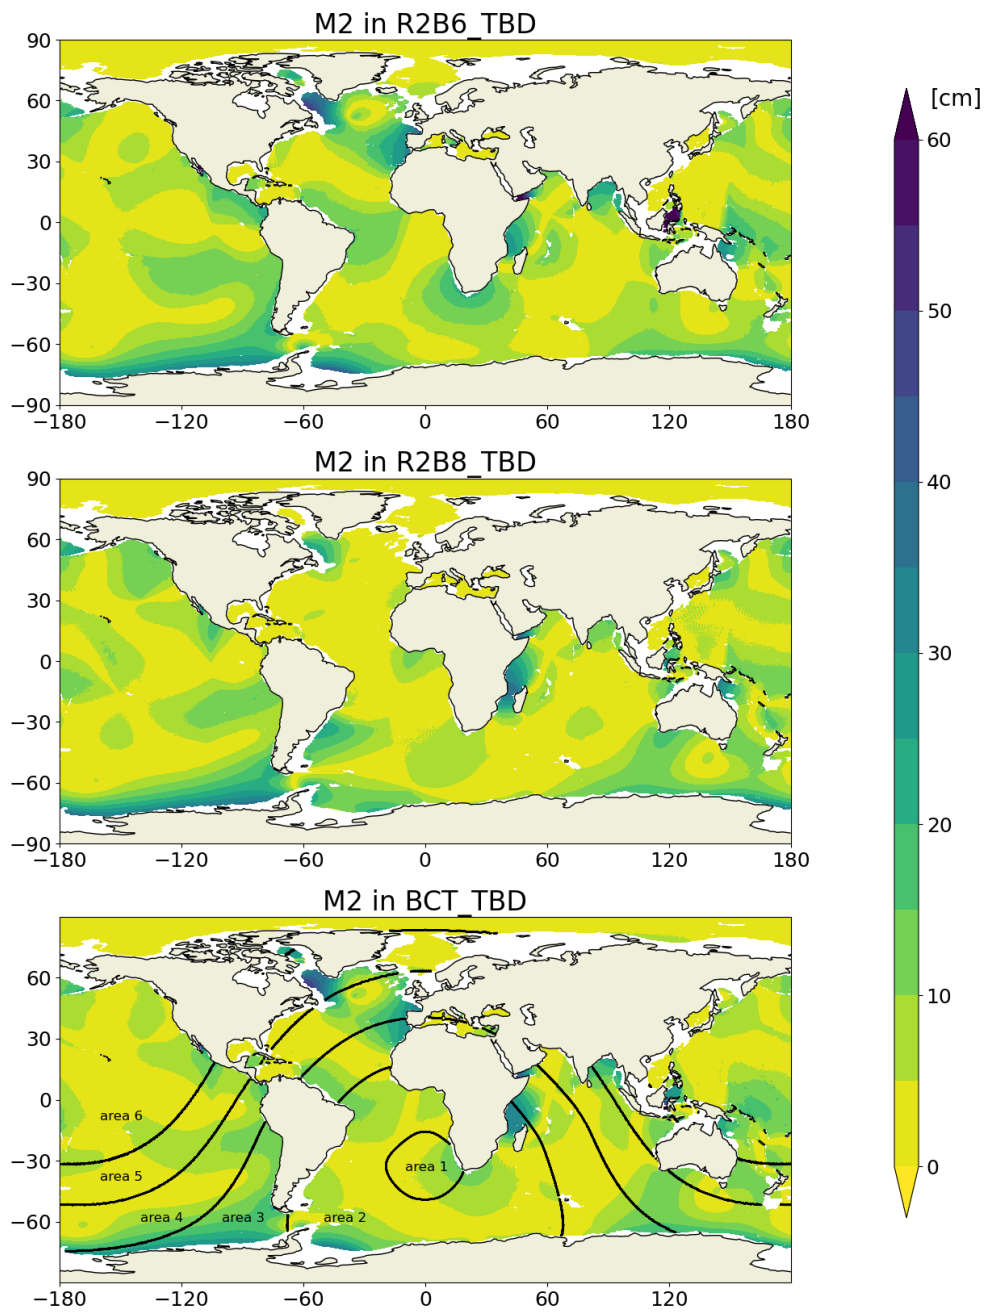

Fig.RC1-5 (as. Fig.7 but with TWD): Same as Fig.RC1-4 but for the difference  $d_{k,AM}$  resulting from errors in amplitude only.

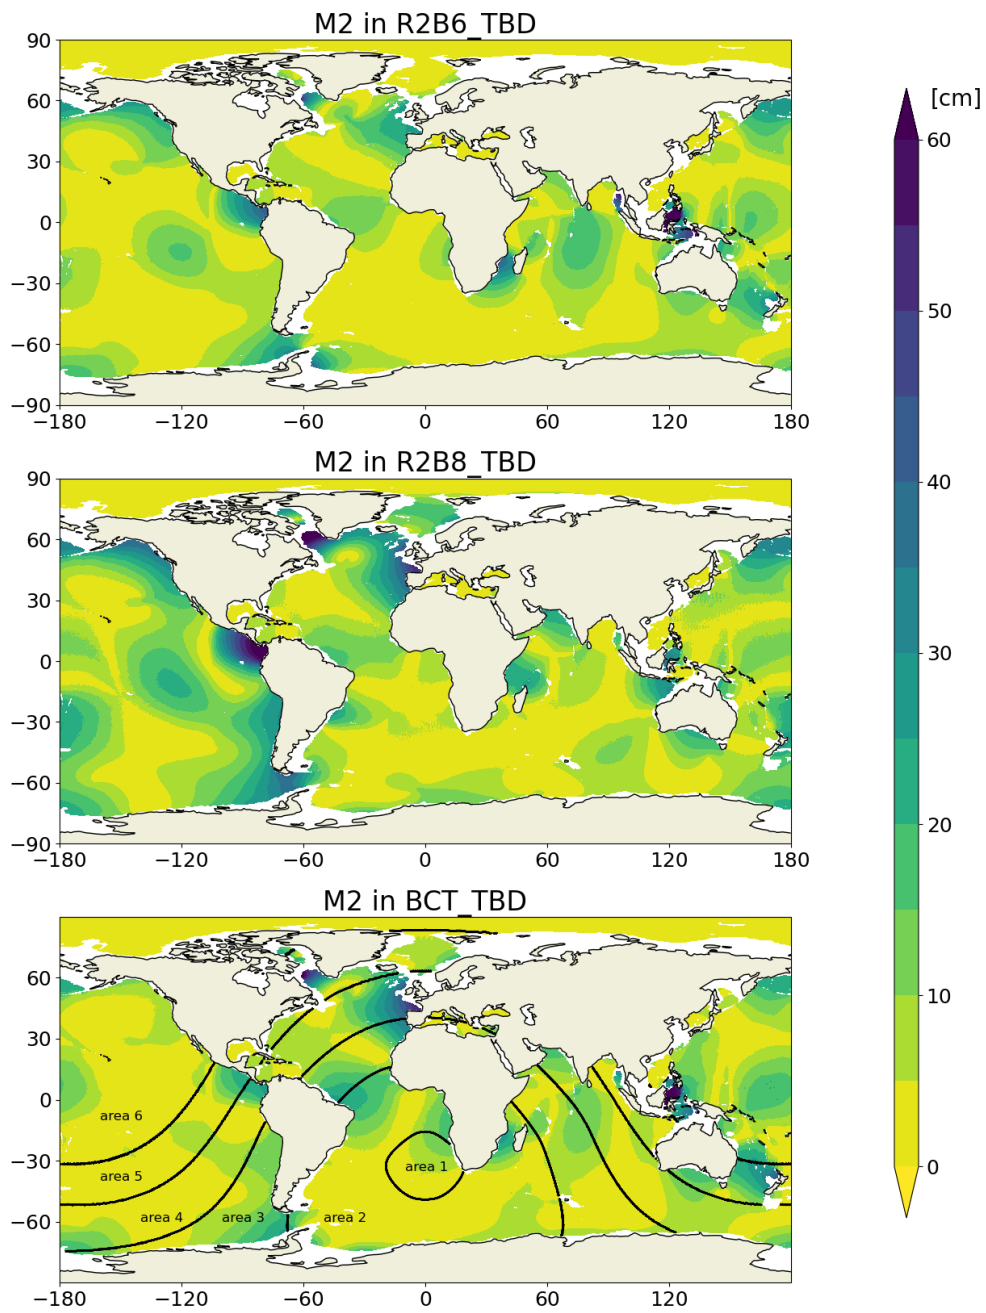

Fig.RC1-6 (as Fig.8 but with TWD): Same as Fig.RC1-4 but for the difference  $d_{k,PH}$  resulting from errors in phase only.
